# Supplementary material
Source: Springer Nature journal article supplement (https://www.springermedizin.de/resource/supplementary/12887_2013_863_MOESM1_ESM.pdf/9475946)

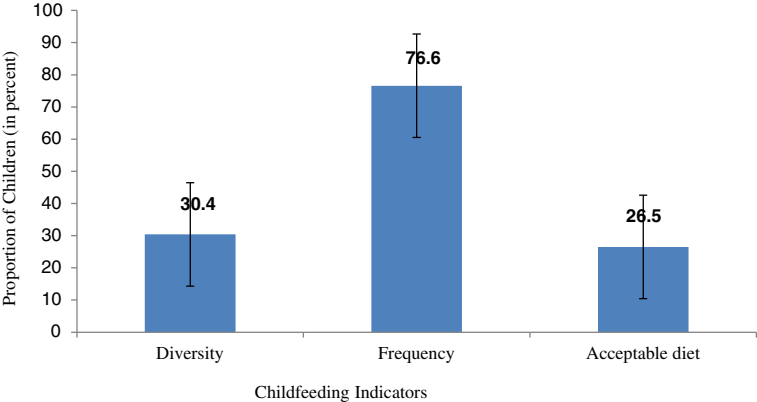

Supplement: MOESM1 [file 9475946]
